# Supplementary material for: Optimization and Determination of Kinetic Parameters of the Synthesis of 5-Lauryl-hydroxymethylfurfural Catalyzed by Lipases
Source: MDPI journal article supplement (doi:10.3390/catal13010019), 2022-12-23
Supplement: s1 [file s1]

Archive with 1 entries (1 files):
- catalysts-2121857-supplementary.pdf
